# Supplementary material for: Epidemiological Trends in the Timing of In-Hospital Death in Acute Myocardial Infarction-Cardiogenic Shock in the United States
Source: PubMed Central journal article supplement (PMC7408956; doi:10.3390/jcm9072094), 2020-07-03
Supplement: jcm-09-02094-s001.pdf [file jcm-09-02094-s001.pdf]

## SUPPLEMENTARY TABLES

**Supplementary Table 1. Administrative codes used for identification of diagnoses and procedures**

| <b>Comorbidity</b>                          | <b>International Classification of Diseases, 9.0 Clinical Modifications codes</b>                                   |
|---------------------------------------------|---------------------------------------------------------------------------------------------------------------------|
| Cardiac arrest                              | 427.5                                                                                                               |
| Cardiogenic shock                           | 785.51                                                                                                              |
| Acute kidney injury                         | 584, 584.5, 584.6, 584.7, 584.8, 584.9                                                                              |
| Respiratory failure                         | 518.81, 518.82, 518.85, 786.09, 799.1, 96.7, 96.70, 96.71, 96.72                                                    |
| Hepatic failure                             | 570.0, 572.2, 573.3, 573.4                                                                                          |
| Hematologic failure                         | 286.6-286.9, 287.4, 287.5                                                                                           |
| Neurological failure                        | 293, 293.0, 293.1, 293.8, 293.81-293.84, 293.89, 293.9, 348.1, 348.3, 348.30, 348.81, 348.39, 780.01, 780.09, 89.14 |
| Invasive hemodynamic assessment             | 37.21, 37.23, 204                                                                                                   |
| Coronary angiography                        | 37.22, 37.23, 88.53-88.56                                                                                           |
| Percutaneous coronary intervention          | 00.66, 36.01, 36.02, 36.05, 36.06, 36.07, 88.57                                                                     |
| Intra-aortic balloon pump                   | 37.61                                                                                                               |
| Percutaneous mechanical circulatory support | 37.68                                                                                                               |
| Extra-corporeal membrane oxygenation        | 39.65                                                                                                               |
| Invasive mechanical ventilation             | 96.7, 96.70, 96.71, 96.72                                                                                           |
| Hemodialysis                                | 39.95                                                                                                               |

## SUPPLEMENTARY FIGURE LEGENDS

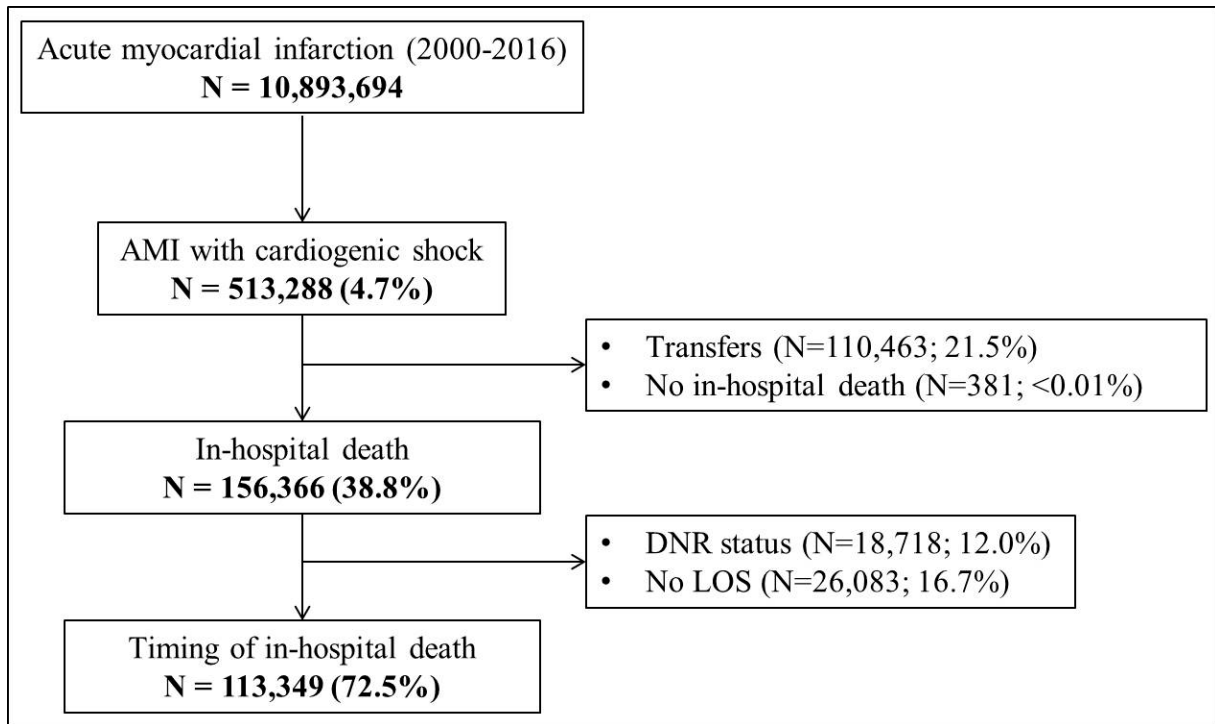

**Supplementary Figure 1. Study cohort**

**Abbreviations: AMI: acute myocardial infarction; DNR: do-not-resuscitate; LOS: length of stay**
